# Supplementary material for: Evolution of metabolic divergence in Pseudomonas aeruginosa during long-term infection facilitates a proto-cooperative interspecies interaction
Source: PubMed Central journal article supplement — ISME J. 2015 Dec 18;10(6):1323–36. doi: 10.1038/ismej.2015.220 (PMC5029194; doi:10.1038/ismej.2015.220), 2015-12-18
Supplement: ismej2015220x1.pdf [file ismej2015220x1.pdf]

**Table S1.** Arbitrary PCR protocol for mariner transposon pBT20

|                      | 1st round                                                                                                                                                                                                                                                                                                                                                                                                                   | 2nd round                                                                                                                                                                                                                                                                                                       |
|----------------------|-----------------------------------------------------------------------------------------------------------------------------------------------------------------------------------------------------------------------------------------------------------------------------------------------------------------------------------------------------------------------------------------------------------------------------|-----------------------------------------------------------------------------------------------------------------------------------------------------------------------------------------------------------------------------------------------------------------------------------------------------------------|
| Mix                  | 2.5 µL 10xPCR buffer<br>2.5 µL 2 mM dNTP<br>1.25 µL 100 % DMSO<br>12.5 µL sterile demineralised water<br>2.5 µL 20 µM primer Rnd1-Pp1 (5'-GGC CAC GCG TCG ACT AGT CAN NNN NNN NNN GAT AT-3')<br>2.5 µL 20 µM primer Rnd1-Pp2(5'-GGC CAC GCG TCG ACT AGT ACN NNN NNN NNN ACG CC-3' )<br>0.5 µL 20 µM primer Rnd1-TnM (5'-GTG AGC GGA TAA CAA TTT CAC ACA G-3')<br>0.5 µL of denatured template DNA<br>0.25 µL Taq polymerase | 5 µL 10xPCR buffer<br>5 µL 2 mM dNTP<br>2.5 µL 100 % DMSO<br>31 µL sterile demineralised water<br>2 µL 20 µM primer Rnd2-Pp (5'-GGC CAC GCG TCG ACT AGT AC-3')<br>2 µL 20 µM primer Rnd2-TnM (5'-ACA GGA AAC AGG ACT CTA GAG G-3' )<br>2 µL of template DNA from 1 <sup>st</sup> round<br>0.5 µL Taq polymerase |
| Thermocycler program | 94 °C for 5 minutes<br>6 cycles of:<br>- 94 °C for 30 seconds<br>- 30 °C for 30 seconds<br>- 72 °C for 1 minute<br>30 cycles of:<br>- 94 °C for 30 seconds<br>- 45 °C for 1 minute<br>- 72 °C for 2 minutes<br>72 °C for 7 minutes<br>4 °C                                                                                                                                                                                  | 94 °C for 5 minutes<br>30 cycles of:<br>- 94 °C for 30 seconds<br>- 45 °C for 30 seconds<br>- 72 °C for 1 minute<br>72 °C for 7 minutes<br>4 °C                                                                                                                                                                 |
