# Supplementary material for: Evolution of metabolic divergence in Pseudomonas aeruginosa during long-term infection facilitates a proto-cooperative interspecies interaction
Source: PubMed Central journal article supplement — ISME J. 2015 Dec 18;10(6):1323–36. doi: 10.1038/ismej.2015.220 (PMC5029194; doi:10.1038/ismej.2015.220), 2015-12-18
Supplement: ismej2015220x2.pdf [file ismej2015220x2.pdf]

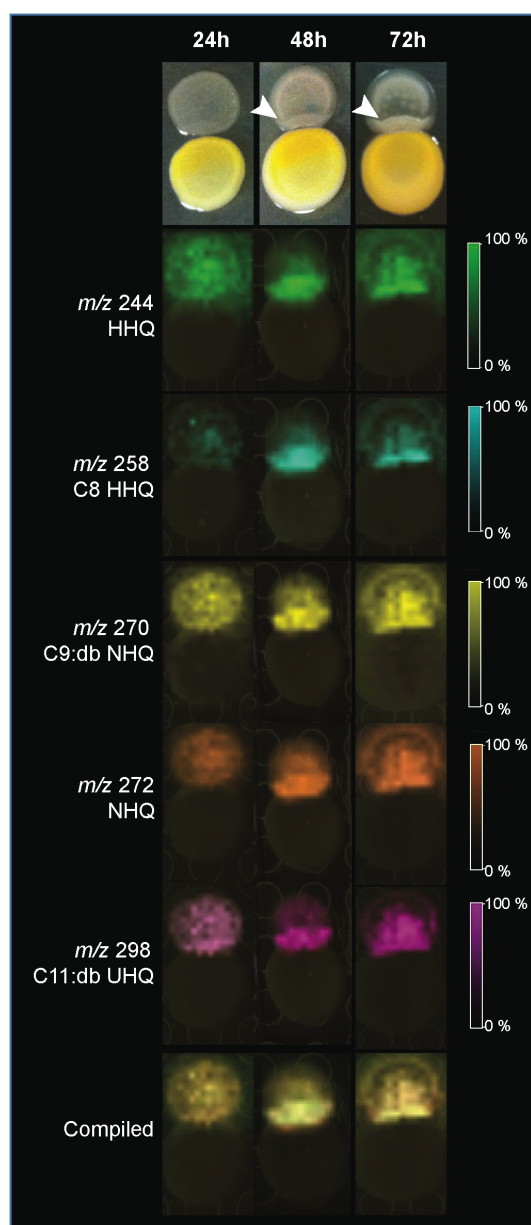

**Figure S1.** MALDI-TOF IMS analysis of HAQ molecules produced by *P. aeruginosa* DK2-P2M24-2003 in interaction with *S. aureus* JE2 after 24h, 48h or 72h of culturing. Ion distributions are displayed as false color overlays of an optical image. Ion-intensity color scaling indicates a highest production of HAQ metabolites in the interface between *P. aeruginosa* DK2-P2M24-2003 and *S. aureus* JE2 after 48h and 72h of culturing. White arrowheads indicate zone of altered *P. aeruginosa* colony morphology.
