# Supplementary material for: Evolution of metabolic divergence in Pseudomonas aeruginosa during long-term infection facilitates a proto-cooperative interspecies interaction
Source: PubMed Central journal article supplement — ISME J. 2015 Dec 18;10(6):1323–36. doi: 10.1038/ismej.2015.220 (PMC5029194; doi:10.1038/ismej.2015.220), 2015-12-18
Supplement: ismej2015220x3.pdf [file ismej2015220x3.pdf]

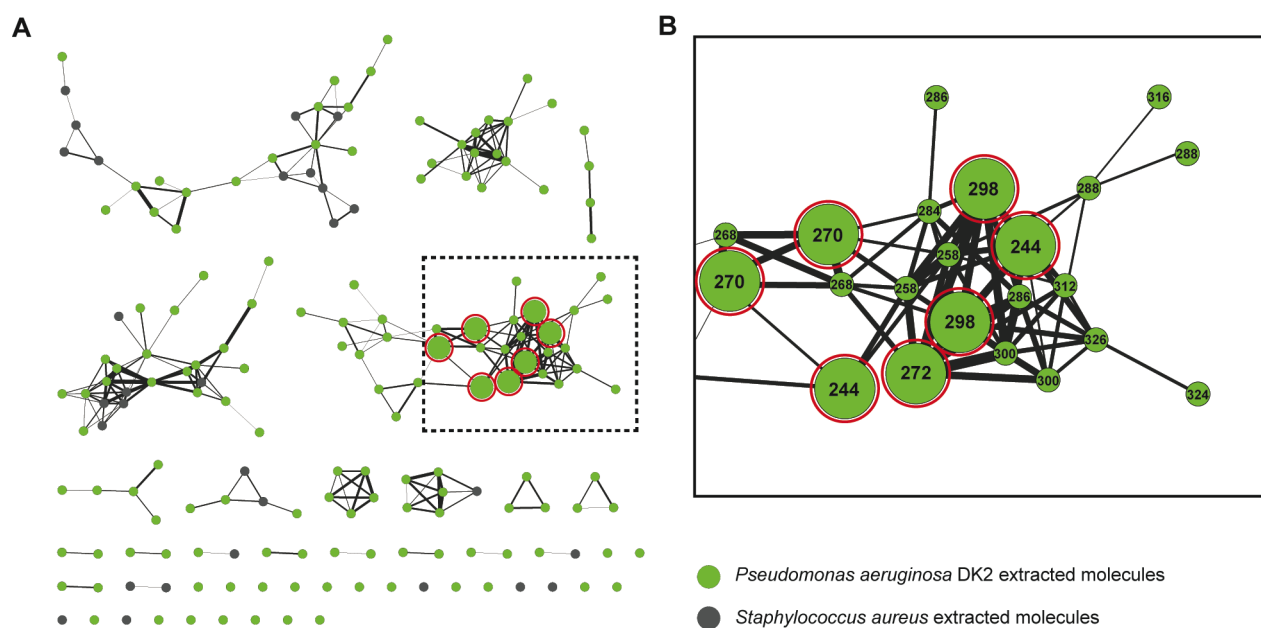

**Figure S2.** (A) A Cytoscape visualization of the molecular network based on MS/MS data obtained from *P. aeruginosa* DK2-P2M24-2003-*S. aureus* interaction after 48 hours co-culturing. Green nodes represent the parent masses for *P. aeruginosa* DK2-P2M24-2003 (**DK2**) extracted molecules and dark grey nodes represent parent masses for *S. aureus* extracted molecules. The thickness of the edges between connecting nodes indicates the level of similarity. (B) Annotated molecular network of HAQ molecules extracted from *P. aeruginosa* DK2-P2M24-2003. Nomenclature and parent masses for the enlarged green nodes with red border are represented in Fig. 4 in the main manuscript.
