# Supplementary material for: Evolution of metabolic divergence in Pseudomonas aeruginosa during long-term infection facilitates a proto-cooperative interspecies interaction
Source: PubMed Central journal article supplement — ISME J. 2015 Dec 18;10(6):1323–36. doi: 10.1038/ismej.2015.220 (PMC5029194; doi:10.1038/ismej.2015.220), 2015-12-18
Supplement: ismej2015220x4.pdf [file ismej2015220x4.pdf]

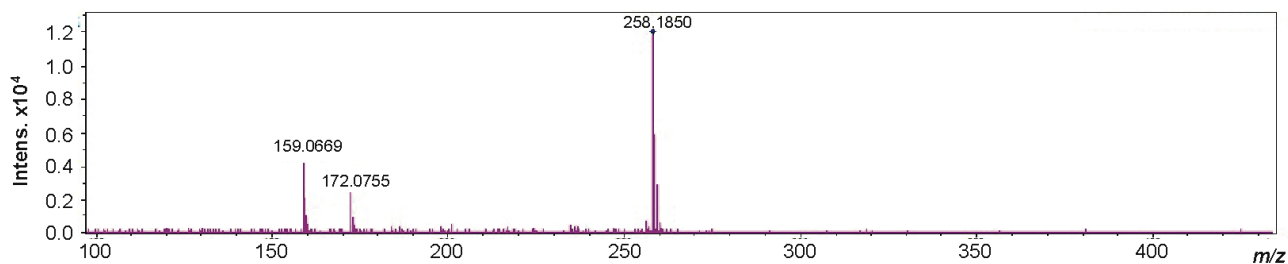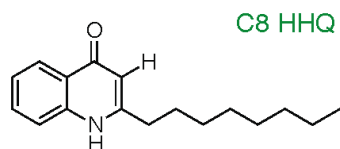

Chemical Formula:  $C_{17}H_{23}NO$   
Exact Mass: 257.377

Calc.  $[M+H]^+$ : 258.385  
Obs.  $[M+H]^+$ : 258.185

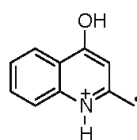

Chemical Formula:  $C_{10}H_9NO^+$   
Exact Mass: 159.0679

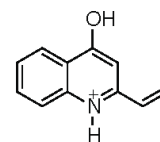

Chemical Formula:  $C_{11}H_{10}NO^+$   
Exact Mass: 172.0757

**Figure S3.** Annotation of the 4-hydroxy-2-alkylquinoline (HAQ) molecule with signal of  $m/z$  258 based on fragmentation pattern from Ion trap,  $MS^1 + MS^2$ , from EtOAc extract of *P. aeruginosa* DK2-P2M24-2003 – *S. aureus* interaction. For nomenclature see (Heeb et al, 2011, Lepine et al, 2004).
