# Supplementary material for: Evolution of metabolic divergence in Pseudomonas aeruginosa during long-term infection facilitates a proto-cooperative interspecies interaction
Source: PubMed Central journal article supplement — ISME J. 2015 Dec 18;10(6):1323–36. doi: 10.1038/ismej.2015.220 (PMC5029194; doi:10.1038/ismej.2015.220), 2015-12-18
Supplement: ismej2015220x5.pdf [file ismej2015220x5.pdf]

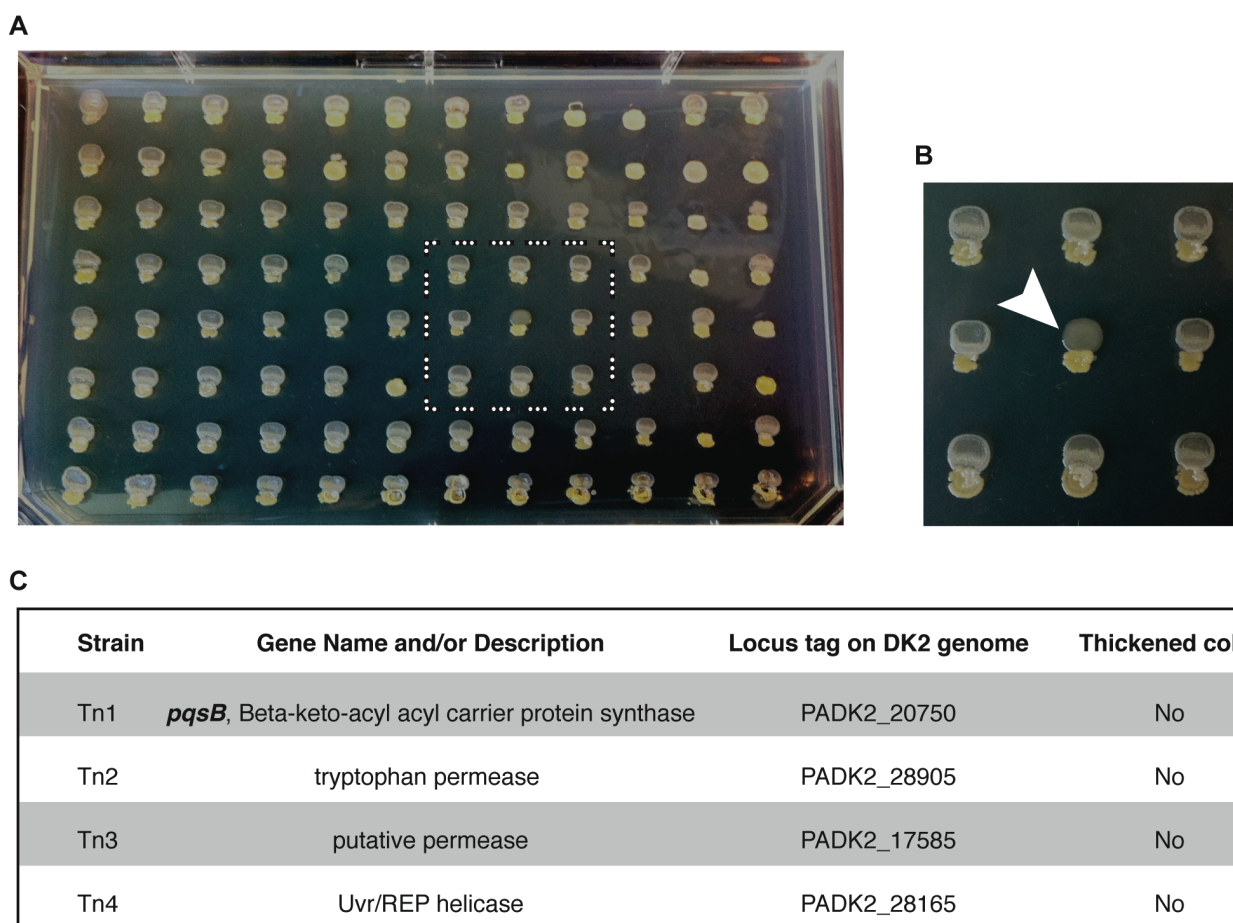

**Figure S4.** Screening of the *P. aeruginosa* DK2-P2M24-2003 transposon mutant library in a spot-interaction setup with *S. aureus* JE2 to find *P. aeruginosa* mutant that no longer show a zone of thickened colony morphology in interaction with *S. aureus*. **(A)** Example of a screening plate with 96 different *P. aeruginosa* DK2-P2M24-2003 mutant strains (top colonies) in interaction with colonies of *S. aureus* JE2 (bottom colonies). **(B)** The detection of a *P. aeruginosa* mutant strain (indicated by white arrowhead), mutated in *pqsB*, which show impaired interaction with *S. aureus*. **(C)** Summary of *P. aeruginosa* DK2-P2M24-2003 mutant strains detected from the spot-interaction screening assay. For mapping transposon insertion junctions in the *P. aeruginosa* DK2-P2M24-2003 chromosome, sequenced arbitrary PCR fragments were compared to the *P. aeruginosa* DK2 reference genome (Accession no.: CP003149).
