# Supplementary material for: Evolution of metabolic divergence in Pseudomonas aeruginosa during long-term infection facilitates a proto-cooperative interspecies interaction
Source: PubMed Central journal article supplement — ISME J. 2015 Dec 18;10(6):1323–36. doi: 10.1038/ismej.2015.220 (PMC5029194; doi:10.1038/ismej.2015.220), 2015-12-18
Supplement: ismej2015220x6.pdf [file ismej2015220x6.pdf]

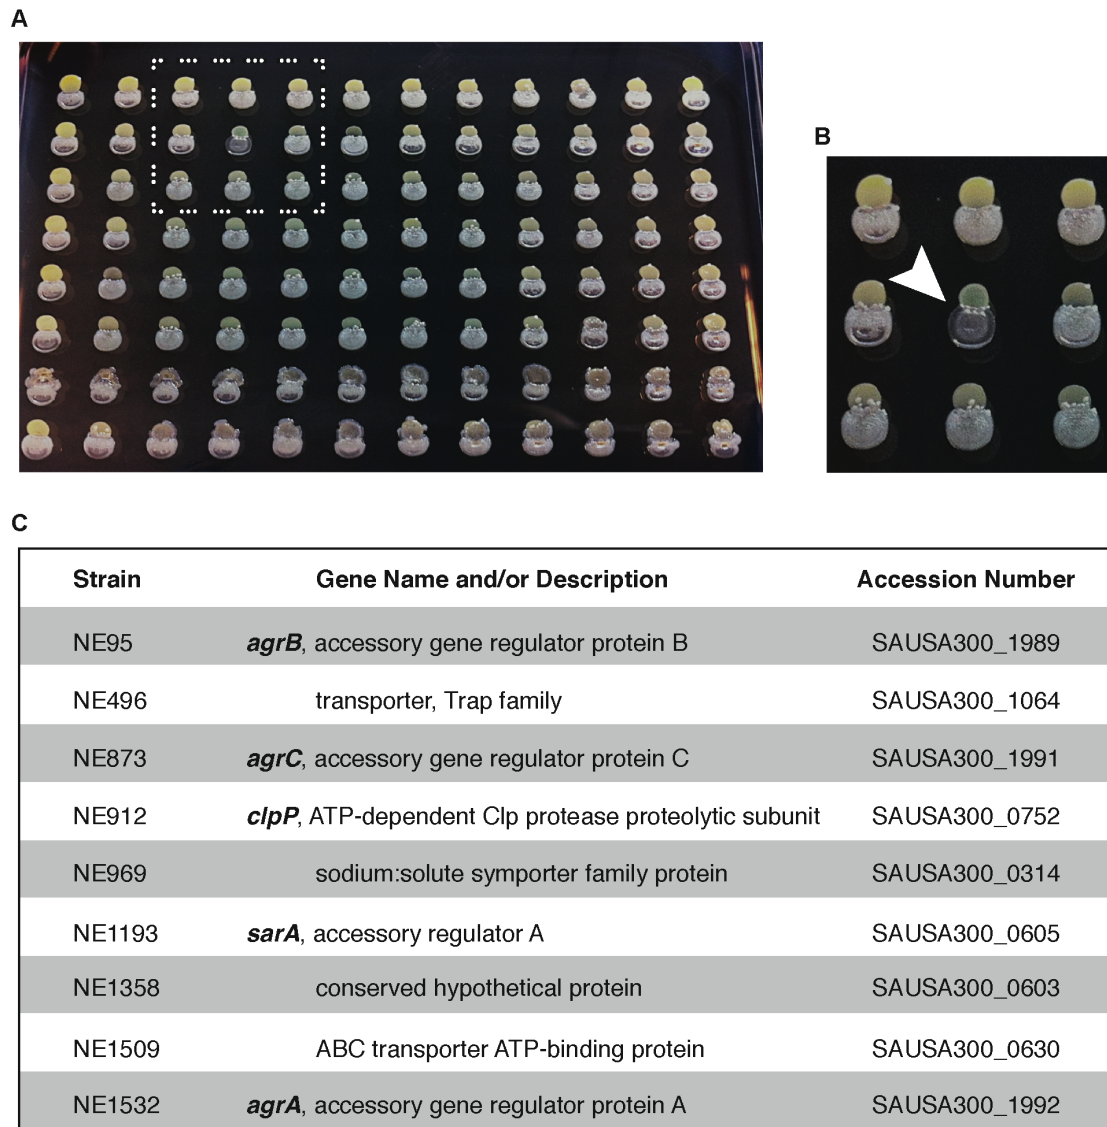

**Figure S5.** Screening of the *S. aureus* Nebraska mutant library (Fey et al, 2013) in a spot-interaction setup with *P. aeruginosa* DK2-P2M24-2003 to find *S. aureus* mutant that no longer induce the zone of thickened *P. aeruginosa* colony morphology. **(A)** Example of a screening plate with 96 different *S. aureus* mutant strains (top colonies) in interaction with colonies of *P. aeruginosa* DK2-P2M24-2003 (bottom colonies). **(B)** The detection of a *S. aureus* mutant strain (indicated by white arrowhead), mutated in *agrC* (NE873), which does not induce the thickened *P. aeruginosa* colony morphology. **(C)** Summary of *S. aureus* mutant strains with impaired *P. aeruginosa* interaction as detected from the spot-interaction screening assay.
