# Supplementary material for: Evolution of metabolic divergence in Pseudomonas aeruginosa during long-term infection facilitates a proto-cooperative interspecies interaction
Source: PubMed Central journal article supplement — ISME J. 2015 Dec 18;10(6):1323–36. doi: 10.1038/ismej.2015.220 (PMC5029194; doi:10.1038/ismej.2015.220), 2015-12-18
Supplement: ismej2015220x7.pdf [file ismej2015220x7.pdf]

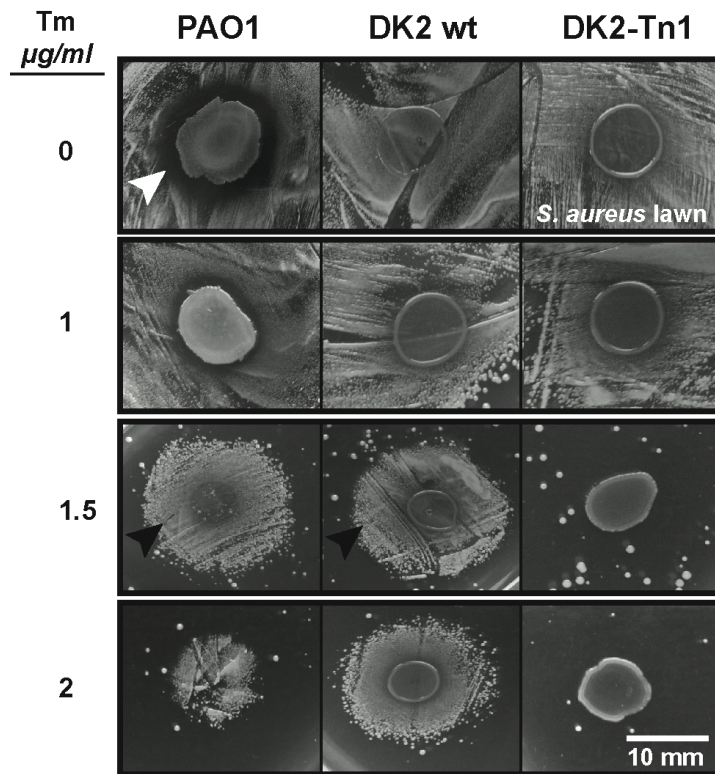

**Figure S6.** Colonies of *P. aeruginosa* PAO1, the DK2-P2M24-2003 wild type (**DK2 wt**) or the *pqsB* mutant, Tn1 (**DK2-Tn1**) grown on a lawn of the *S. aureus agrC* mutant on LB agar plates with addition of tobramycin (Tm) as indicated. *P. aeruginosa* PAO1 produce HQNO, whereas DK2-P2M24-2003 and Tn1 is defective for HQNO or 4-hydroxy-2-alkylquinoline (HAQ) production, respectively. On LB agar without tobramycin *P. aeruginosa* PAO1, but not DK2-P2M24-2003 or Tn1, suppresses the growth of *S. aureus* (indicated by a white arrowhead). By tobramycin concentrations  $> 1.5 \mu\text{g/ml}$  *S. aureus* grows in a zone surrounding the PAO1 and DK2-P2M24-2003 colonies (indicated by black arrowheads), but not the Tn1 colony.
